# Supplementary material for: Truncated S-MGBs: towards a parasite-specific and low aggregation chemotype
Source: Royal Society of Chemistry journal article supplement (doi:10.1039/d1md00110h), 2021-01-01
Supplement: d1md00110h1.pdf [file d1md00110h1.pdf]

## **Truncated S-MGBs: Towards a parasite-specific and low aggregation chemotype, ESI**

### **Contents Page**

|                                                                                  |    |
|----------------------------------------------------------------------------------|----|
| Experimental Data of <sup>1</sup> HNMR investigations of S-MGB <b>4</b> .....    | 2  |
| <sup>1</sup> HNMR analysis and data of S-MGB <b>4</b> .....                      | 2  |
| <sup>1</sup> HNMR solvent composition experiments of S-MGB <b>4</b> .....        | 3  |
| <sup>1</sup> HNMR proton peak shift analysis of compound S-MGB <b>4</b> .....    | 4  |
| Experimental Data of <sup>1</sup> HNMR investigations of S-MGB <b>10</b> .....   | 9  |
| <sup>1</sup> HNMR analysis and data of S-MGB <b>10</b> .....                     | 9  |
| <sup>1</sup> HNMR solvent composition experiments of S-MGB <b>10</b> .....       | 10 |
| <sup>1</sup> HNMR proton peak shift analysis of compound S-MGB <b>10</b> .....   | 11 |
| Acquired 2D DOSY and diffusion data for S-MGB <b>4</b> and S-MGB <b>10</b> ..... | 14 |
| 2D DOSY spectra MGB <b>4</b> .....                                               | 14 |
| Accompanying diffusion data for S-MGB <b>4</b> .....                             | 15 |
| Acquired 2D DOSY and diffusion data for S-MGB <b>10</b> .....                    | 16 |
| 2D DOSY spectra S-MGB <b>10</b> .....                                            | 16 |
| Accompanying diffusion data for S-MGB <b>10</b> .....                            | 16 |
| 2D DOSY spectra of S-MGB <b>4</b> and S-MGB <b>10</b> overlay .....              | 17 |

# Experimental Data of <sup>1</sup>H NMR investigations of S-MGB 4

## <sup>1</sup>H NMR analysis and data of S-MGB 4

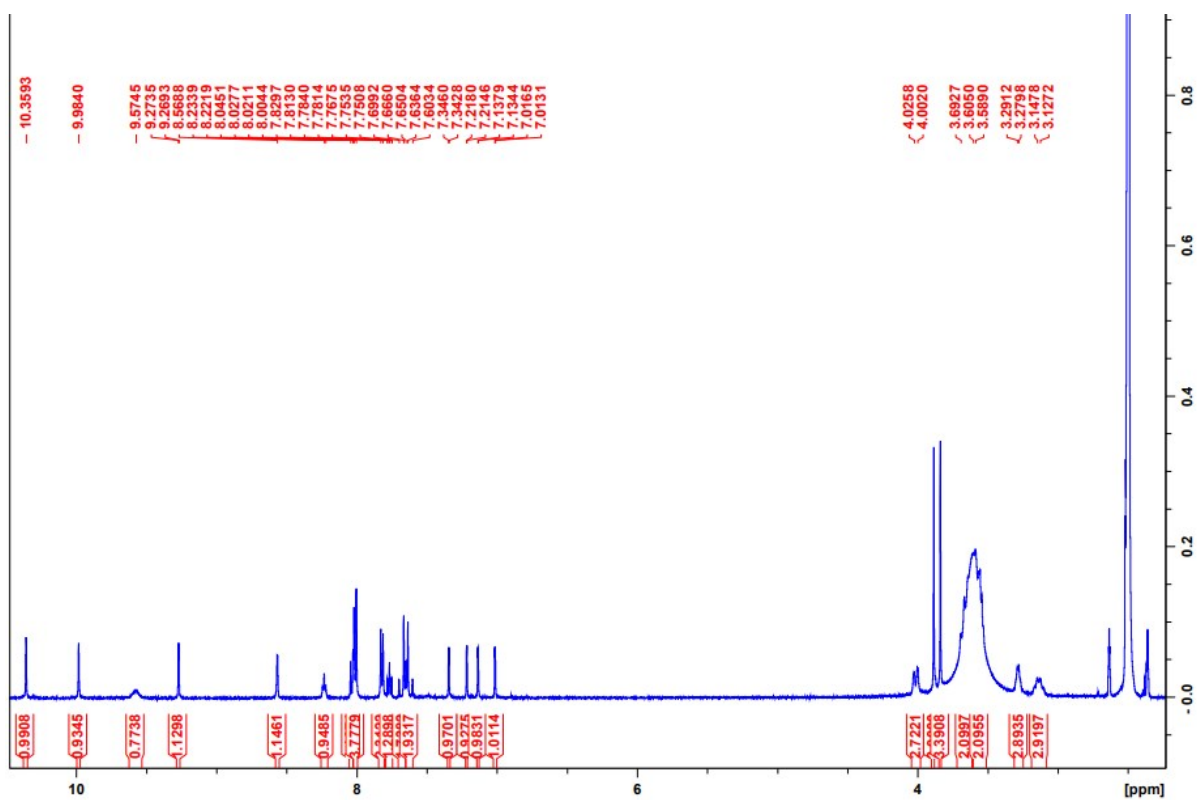

Figure S1. <sup>1</sup>H NMR spectra of 4. Solvent composition 100% DMSO-*d*<sub>6</sub>

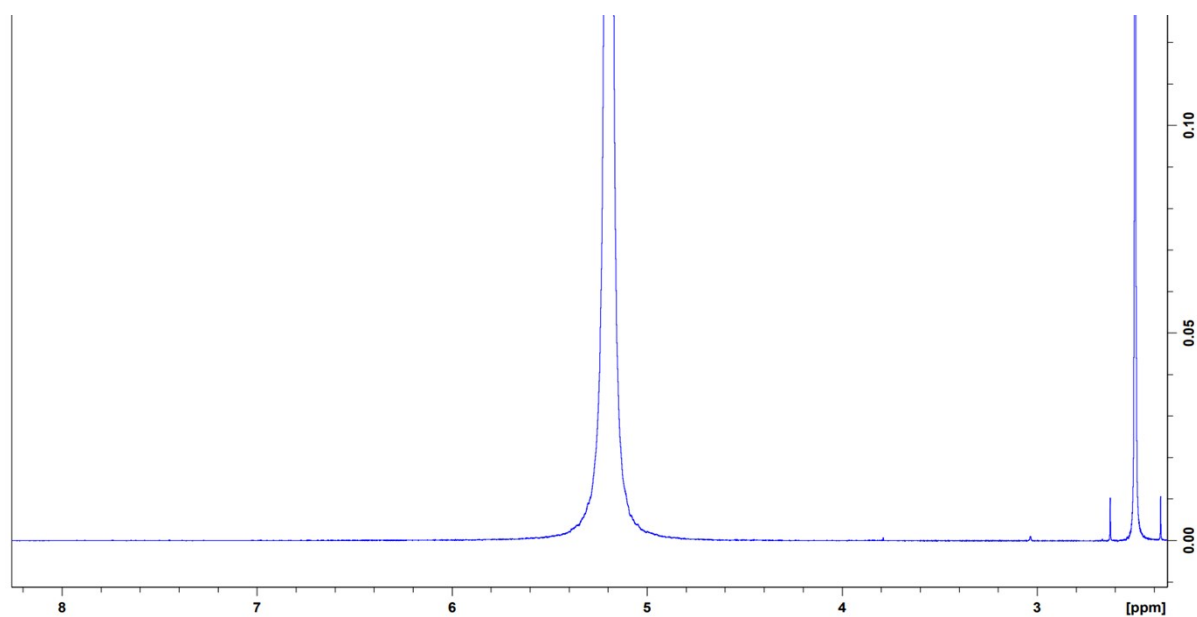

Figure S2. <sup>1</sup>H NMR spectra of 4. Solvent composition 100% 0.1M sodium acetate buffer.

## <sup>1</sup>H NMR solvent composition experiments of S-MGB 4

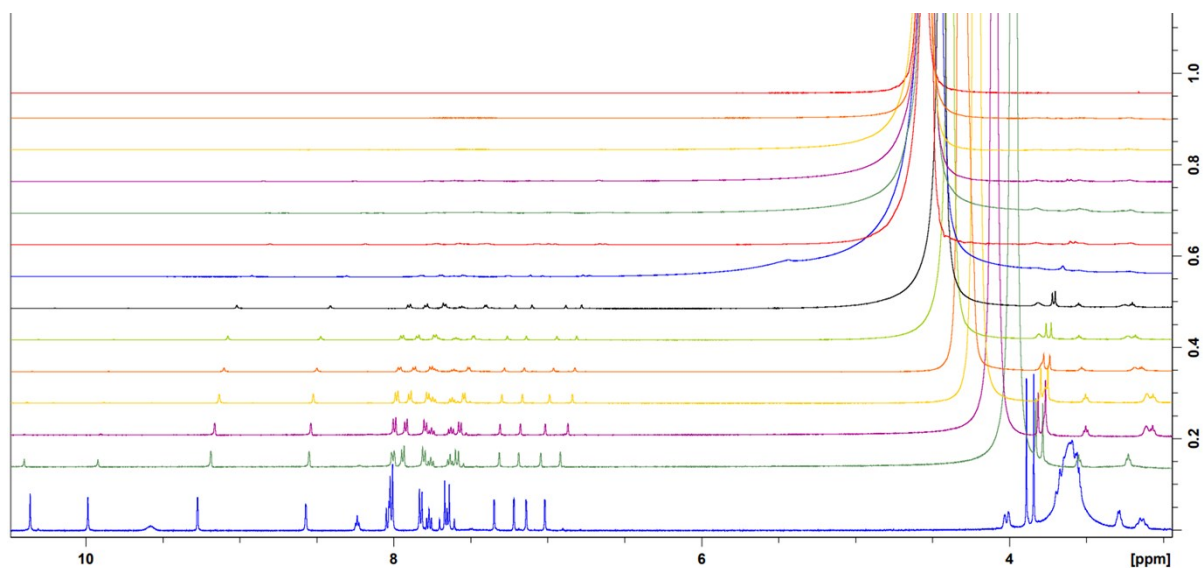

**Figure S3.** Full overlaid <sup>1</sup>H NMR of compound **4** composition experiment. The spectra were obtained with the following solvent system compositions: (A) 100 % DMSO-*d*<sub>6</sub> (B) 80 % DMSO-*d*<sub>6</sub>: 20 % 0.1M pH5 sodium acetate buffer, (C) 75 % DMSO-*d*<sub>6</sub>: 25 % 0.1 M pH5 sodium acetate buffer, (D) 70 % DMSO-*d*<sub>6</sub>: 30 % 0.1 M pH5 sodium acetate buffer, (E) 65 % DMSO-*d*<sub>6</sub>: 35 % 0.1M pH5 sodium acetate buffer, (F) 60 % DMSO-*d*<sub>6</sub>: 40 % 0.1M pH5 sodium acetate buffer, (G) 55 % DMSO-*d*<sub>6</sub>: 45 % 0.1 M pH5 sodium acetate buffer, (H) 50 % DMSO-*d*<sub>6</sub>: 50 % 0.1M pH5 sodium acetate buffer, (I) 45 % DMSO-*d*<sub>6</sub>: 55 % 0.1M pH5 sodium acetate buffer, (J) 40 % DMSO-*d*<sub>6</sub>: 60 % 0.1M pH5 sodium acetate buffer, (K) 35 % DMSO-*d*<sub>6</sub>: 65 % 0.1M pH5 sodium acetate buffer, (L) 30 % DMSO-*d*<sub>6</sub>: 70 % 0.1M pH5 sodium acetate buffer, (M) 25 % DMSO-*d*<sub>6</sub>: 75 % 0.1M pH5 sodium acetate buffer, (N) 100 % 0.1M pH5 sodium acetate buffer. The concentration of S-MGB **4** was fixed at 1.5 mM in each experiment.

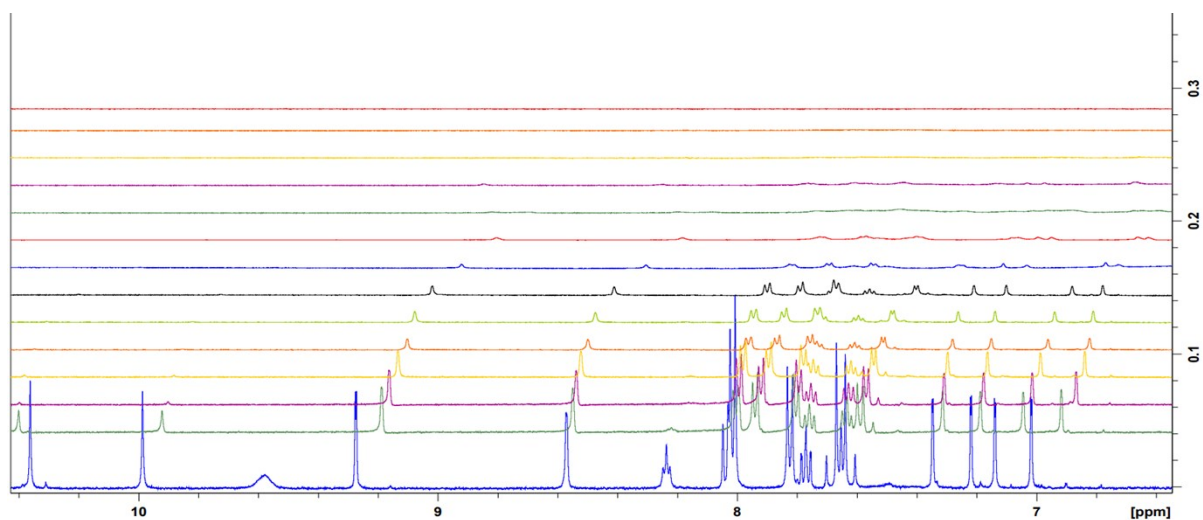

**Figure S4.** <sup>1</sup>H NMR of the aromatic region of compound **4** composition experiment. The spectra were obtained with the following solvent system compositions: (A) 100 % DMSO-*d*<sub>6</sub> (B) 80 % DMSO-*d*<sub>6</sub>: 20 % 0.1M pH5 sodium acetate buffer, (C) 75 % DMSO-*d*<sub>6</sub>: 25 % 0.1M pH5 sodium acetate buffer, (D) 70 % DMSO-*d*<sub>6</sub>: 30 % 0.1M pH5 sodium acetate buffer, (E) 65 % DMSO-*d*<sub>6</sub>: 35 % 0.1M pH5 sodium acetate buffer, (F) 60 % DMSO-*d*<sub>6</sub>: 40 % 0.1M pH5 sodium acetate buffer, (G) 55 % DMSO-*d*<sub>6</sub>: 45 % 0.1M pH5 sodium acetate buffer, (H) 50 % DMSO-*d*<sub>6</sub>: 50 % 0.1M pH5 sodium acetate buffer, (I) 45 % DMSO-*d*<sub>6</sub>: 55 % 0.1M pH5 sodium acetate buffer, (J) 40 % DMSO-*d*<sub>6</sub>: 60 % 0.1M pH5 sodium acetate buffer, (K) 35 % DMSO-*d*<sub>6</sub>: 65 % 0.1M pH5 sodium acetate buffer, (L) 30 % DMSO-*d*<sub>6</sub>: 70 % 0.1M pH5 sodium acetate buffer, (M) 25 % DMSO-*d*<sub>6</sub>: 75 % 0.1M pH5 sodium acetate buffer, (N) 100 % 0.1M pH5 sodium acetate buffer. The concentration of S-MGB **4** was fixed at 1.5 mM in each experiment.

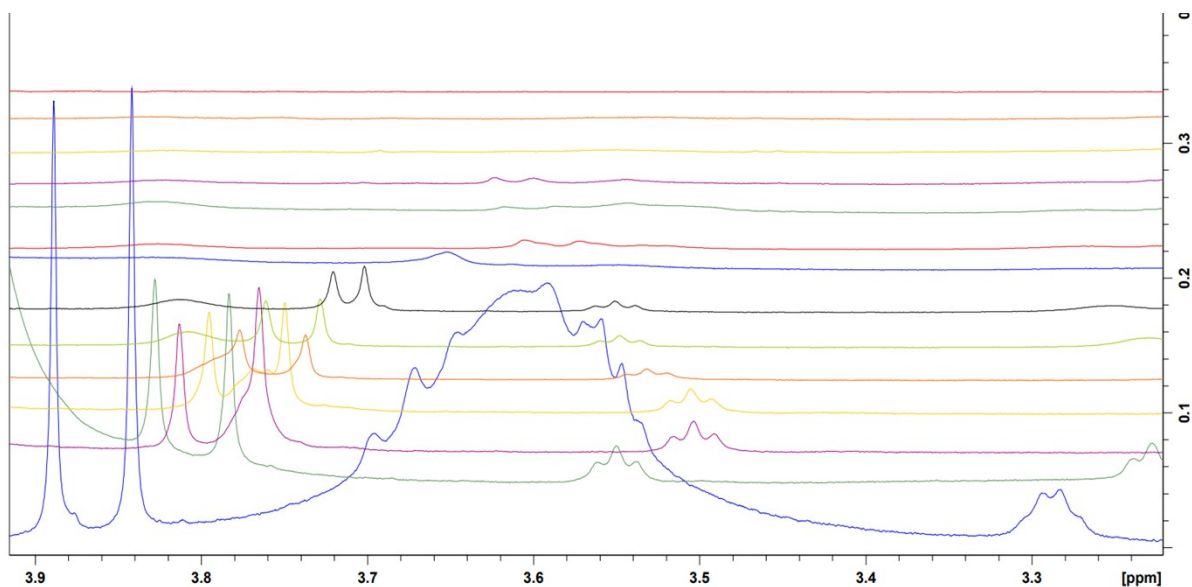

**Figure S5.**  $^1\text{H}$  NMR of the aliphatic region of compound **4** composition experiment. The spectra were obtained with the following solvent system compositions: (A) 100 %  $\text{DMSO-}d_6$  (B) 80 %  $\text{DMSO-}d_6$ : 20 % 0.1M pH5 sodium acetate buffer, (C) 75 %  $\text{DMSO-}d_6$ : 25 % 0.1M pH5 sodium acetate buffer, (D) 70 %  $\text{DMSO-}d_6$ : 30 % 0.1M pH5 sodium acetate buffer, (E) 65 %  $\text{DMSO-}d_6$ : 35 % 0.1M pH5 sodium acetate buffer, (F) 60 %  $\text{DMSO-}d_6$ : 40 % 0.1M pH5 sodium acetate buffer, (G) 55 %  $\text{DMSO-}d_6$ : 45 % 0.1M pH5 sodium acetate buffer, (H) 50 %  $\text{DMSO-}d_6$ : 50 % 0.1M pH5 sodium acetate buffer, (I) 45 %  $\text{DMSO-}d_6$ : 55 % 0.1M pH5 sodium acetate buffer, (J) 40 %  $\text{DMSO-}d_6$ : 60 % 0.1M pH5 sodium acetate buffer, (K) 35 %  $\text{DMSO-}d_6$ : 65 % 0.1M pH5 sodium acetate buffer, (L) 30 %  $\text{DMSO-}d_6$ : 70 % 0.1M pH5 sodium acetate buffer, (M) 25 %  $\text{DMSO-}d_6$ : 75 % 0.1M pH5 sodium acetate buffer, (N) 100 % pH5 sodium acetate buffer. The concentration of S-MGB **4** was fixed at 1.5 mM in each experiment.

#### $^1\text{H}$ NMR proton peak shift analysis of compound S-MGB **4**

$^1\text{H}$ -NMR spectra were systematically acquired in solvent systems with different proportions of  $\text{DMSO-}d_6$  and pH5 sodium acetate buffer, using a fixed concentration of 1.5mM of S-MGB. The graphs below display the data obtained, with each graph focusing on the  $^1\text{H}$ NMR peak shift of a specific proton of compound S-MGB **4**, labelled in **Figure S6**.

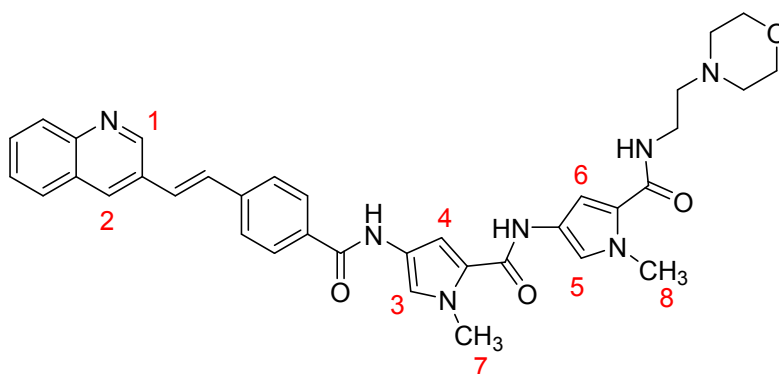

**Figure S6.** Structure and specific proton assignment of S-MGB **4**.

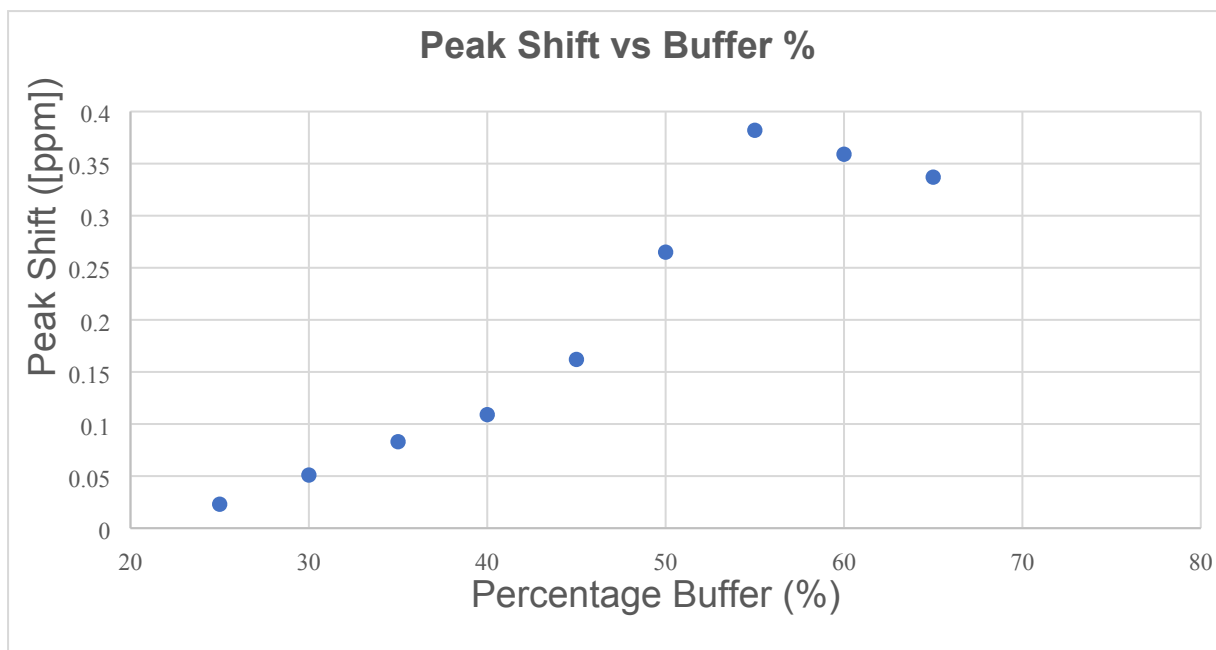

**Graph S1.** Peak shift difference of quinoline proton 1 in varying solvent system compositions.

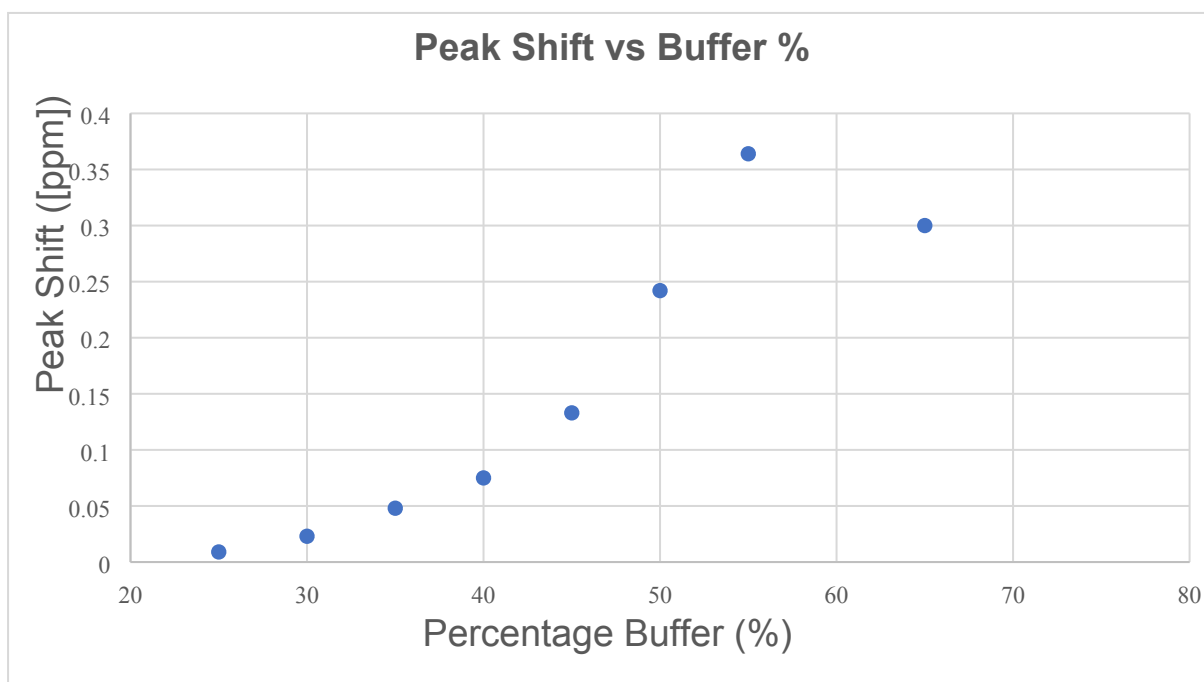

**Graph S2.** Peak shift difference of quinoline proton 2 in varying solvent system compositions.

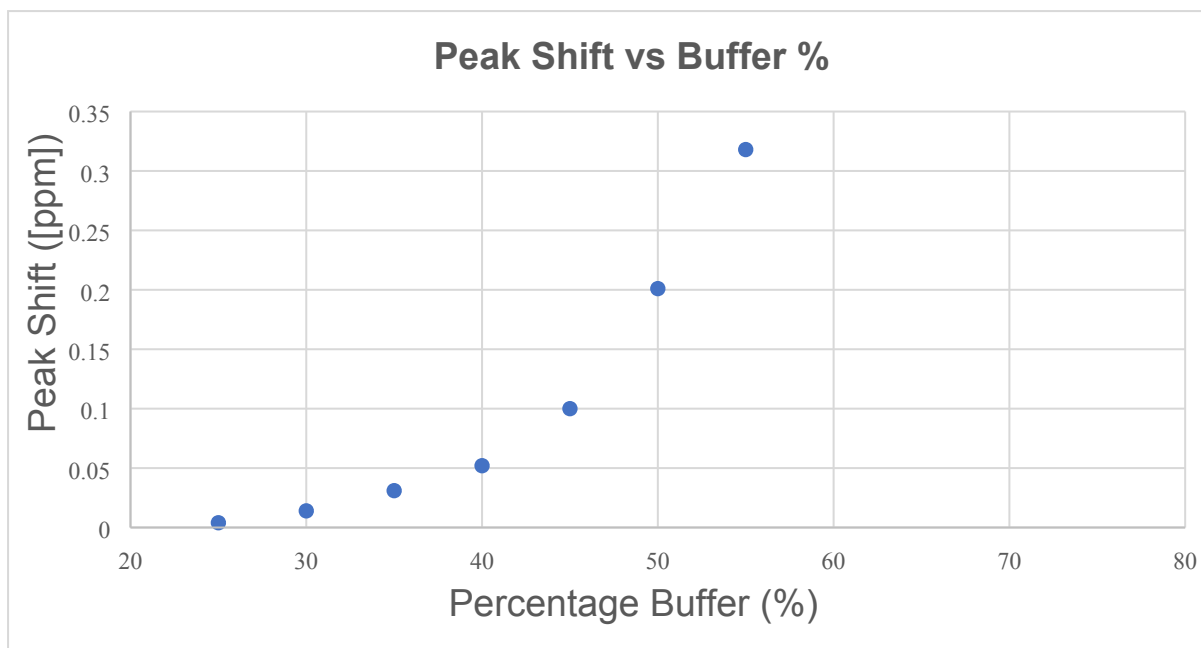

**Graph S3.** Peak shift difference of pyrrole proton **3** in varying solvent system compositions.

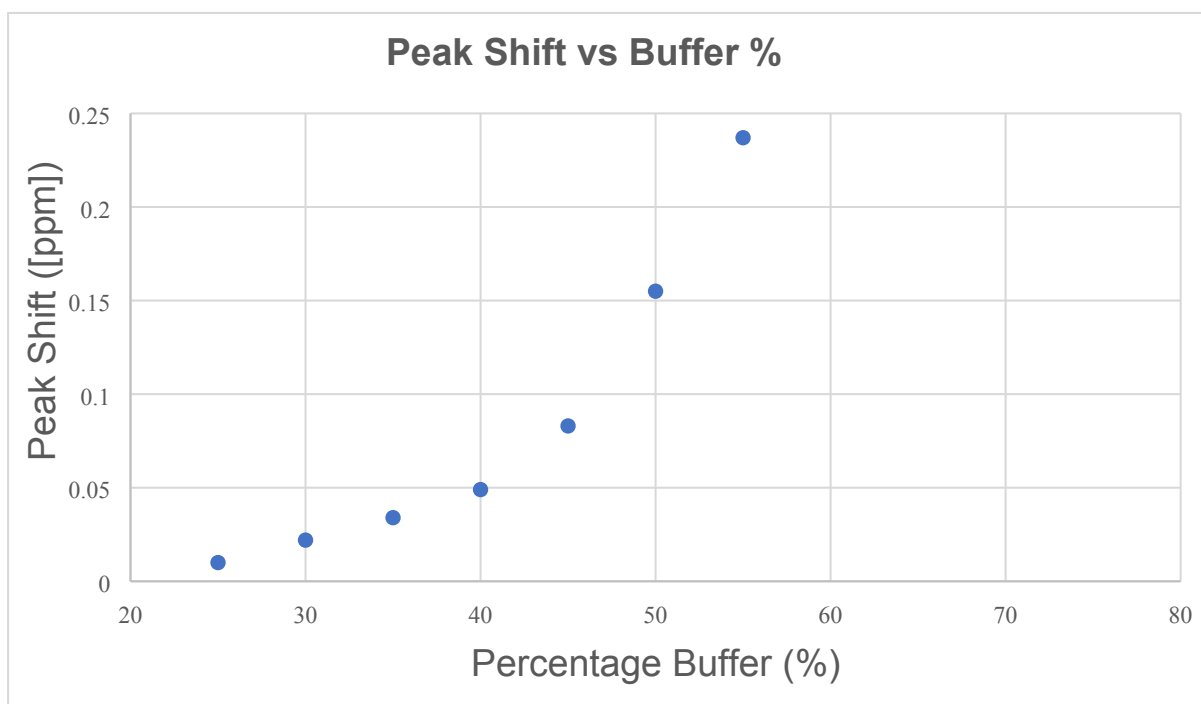

**Graph S4.** Peak shift difference of pyrrole proton **4** in varying solvent system compositions.

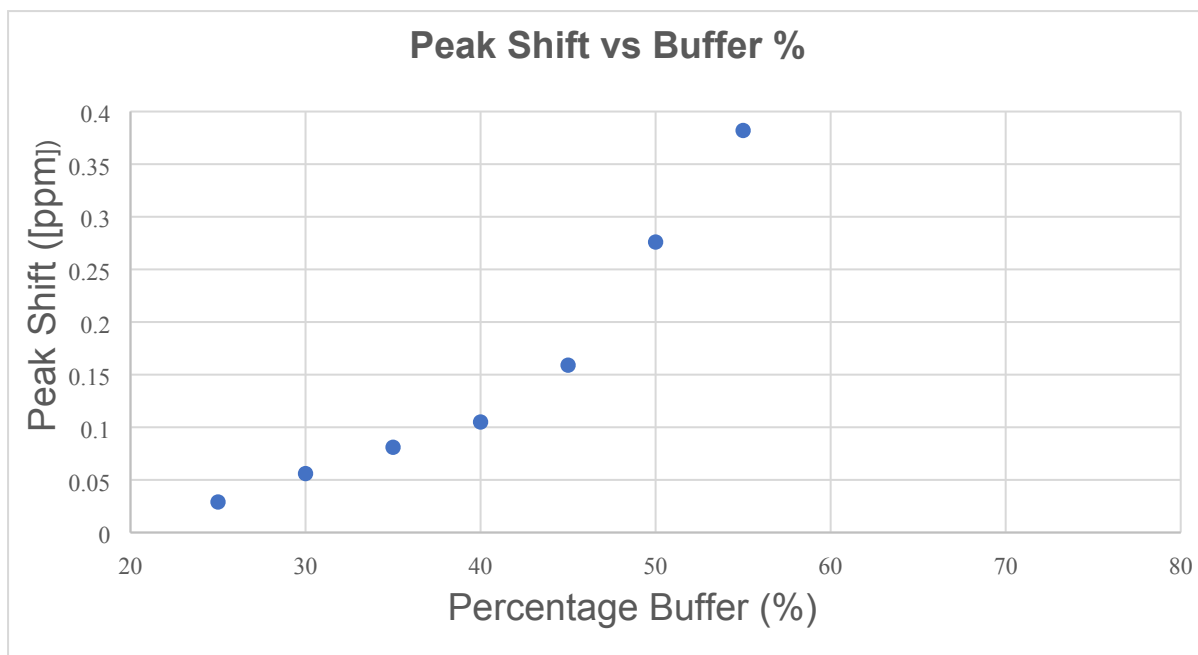

**Graph S5.** Peak shift difference of pyrrole proton **5** in varying solvent system compositions.

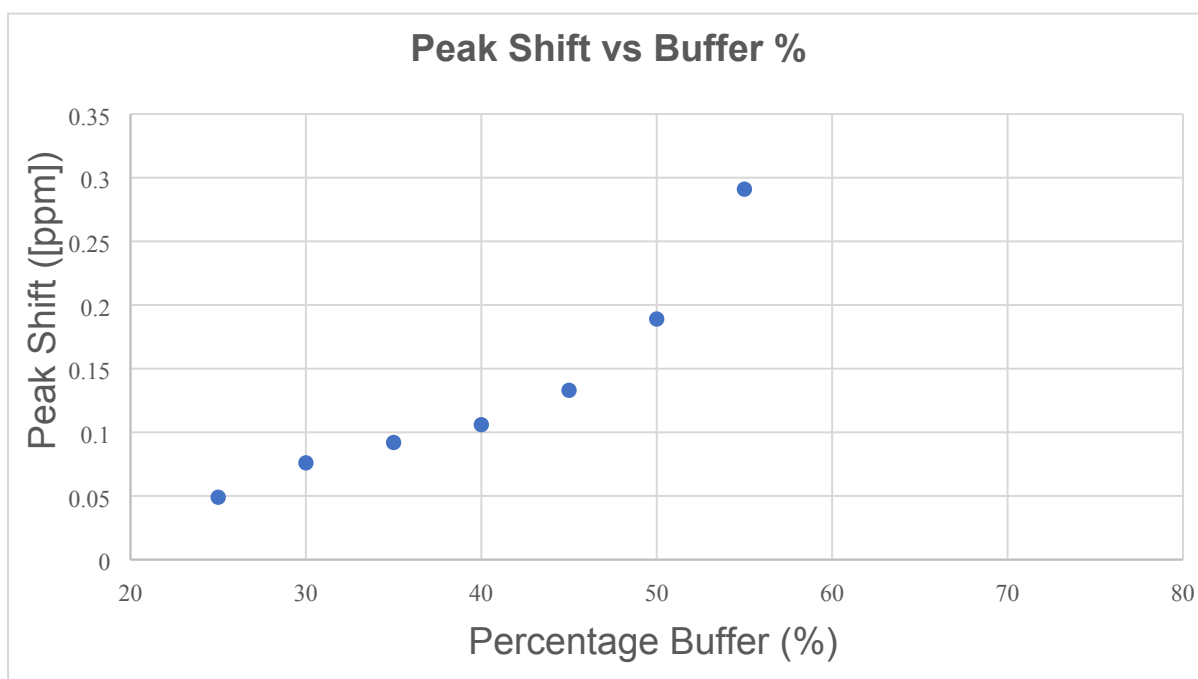

**Graph S6.** Peak shift difference of pyrrole proton **6** in varying solvent system compositions.

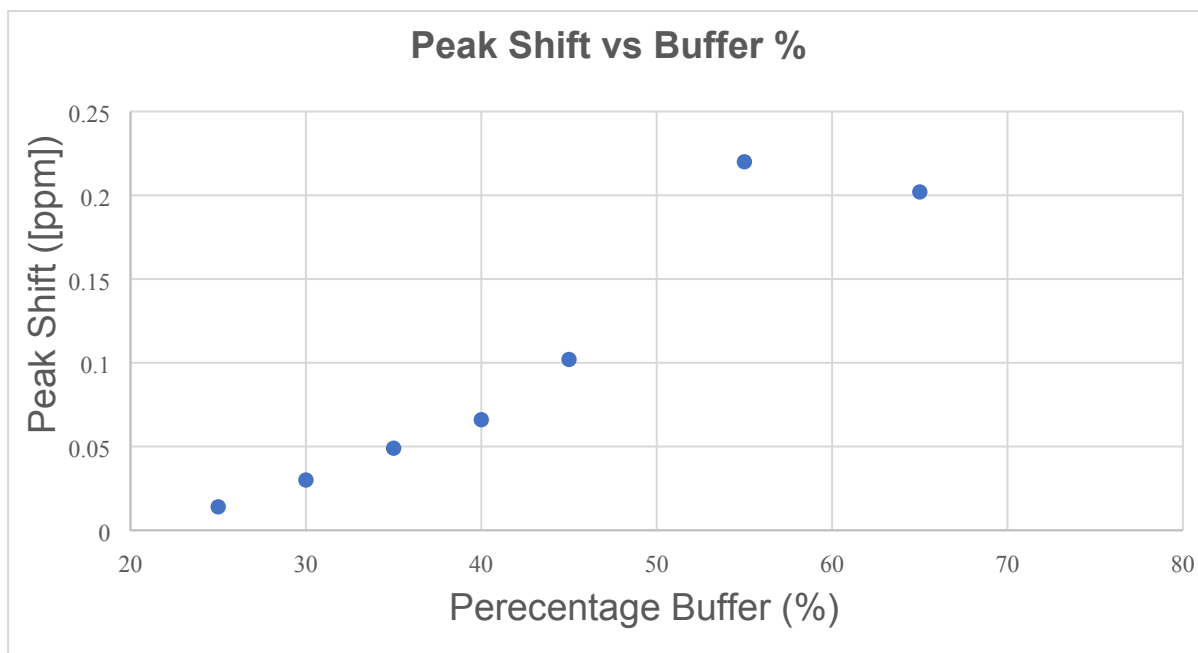

**Graph S7.** Peak shift difference of methyl proton **7** in varying solvent system compositions.

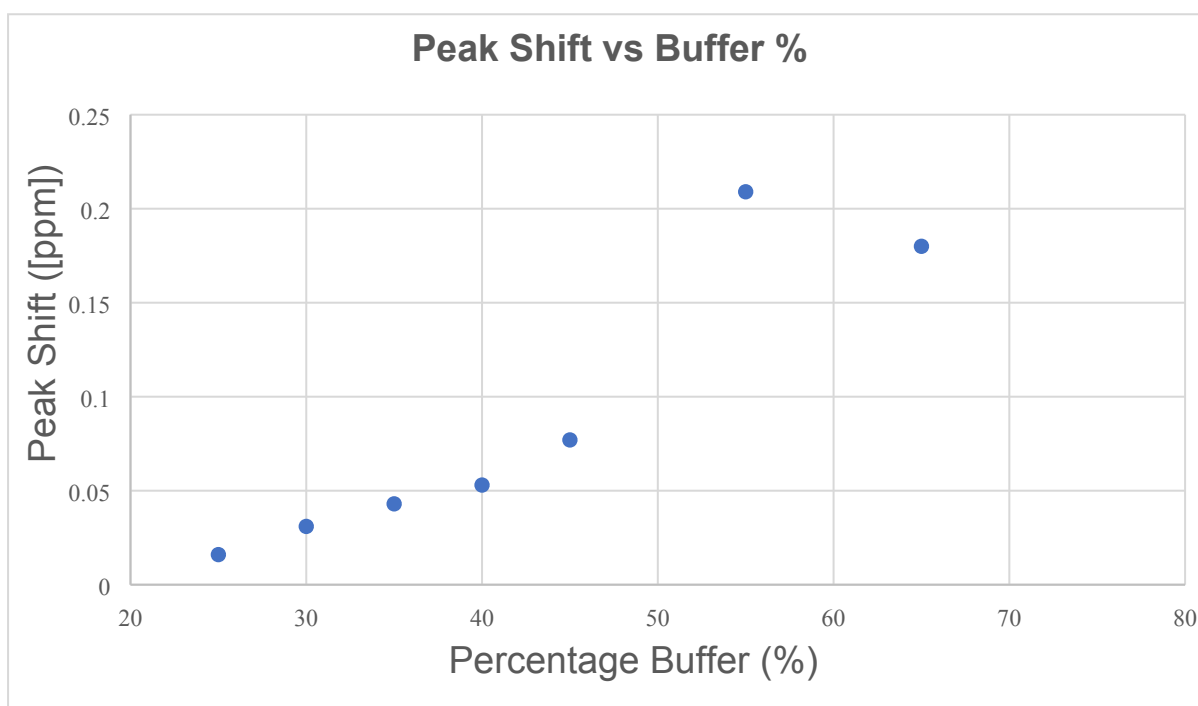

**Graph S8.** Peak shift difference of methyl proton **8** in varying solvent system compositions.



# Experimental Data of <sup>1</sup>H NMR investigations of S-MGB 10

## <sup>1</sup>H NMR analysis and data of S-MGB 10

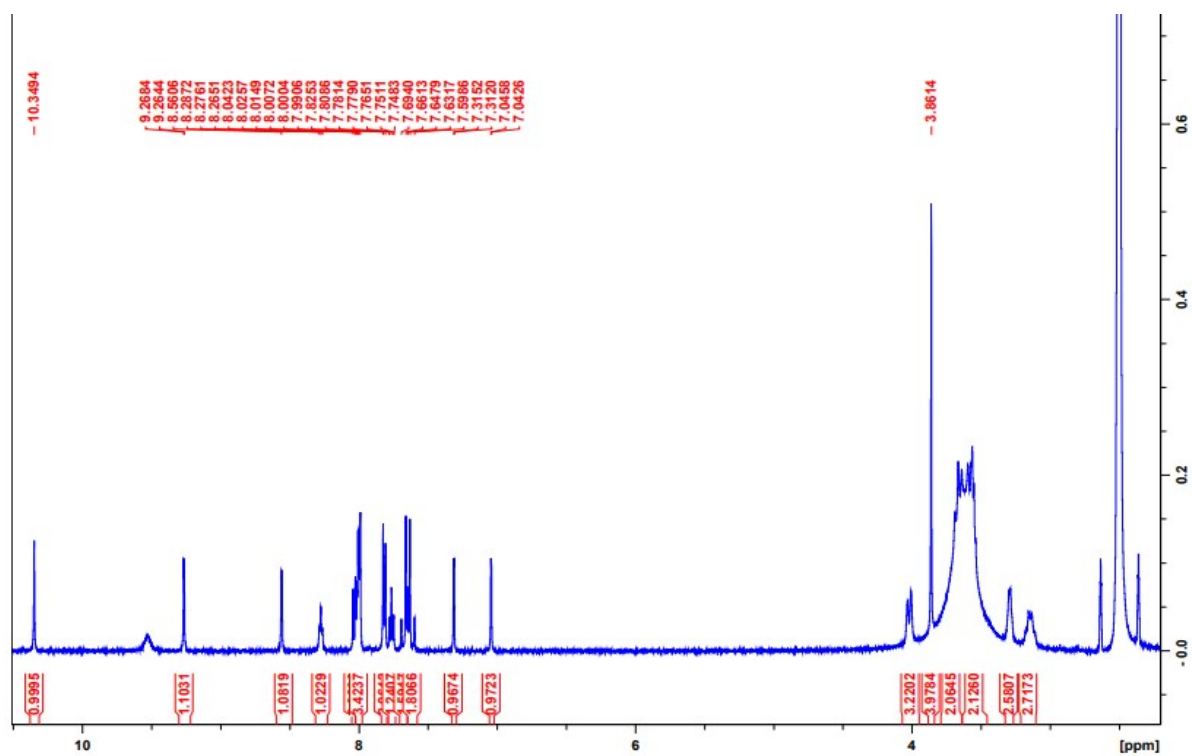

Figure S7. <sup>1</sup>H NMR spectra of 10. Solvent composition 100% DMSO-*d*<sub>6</sub>

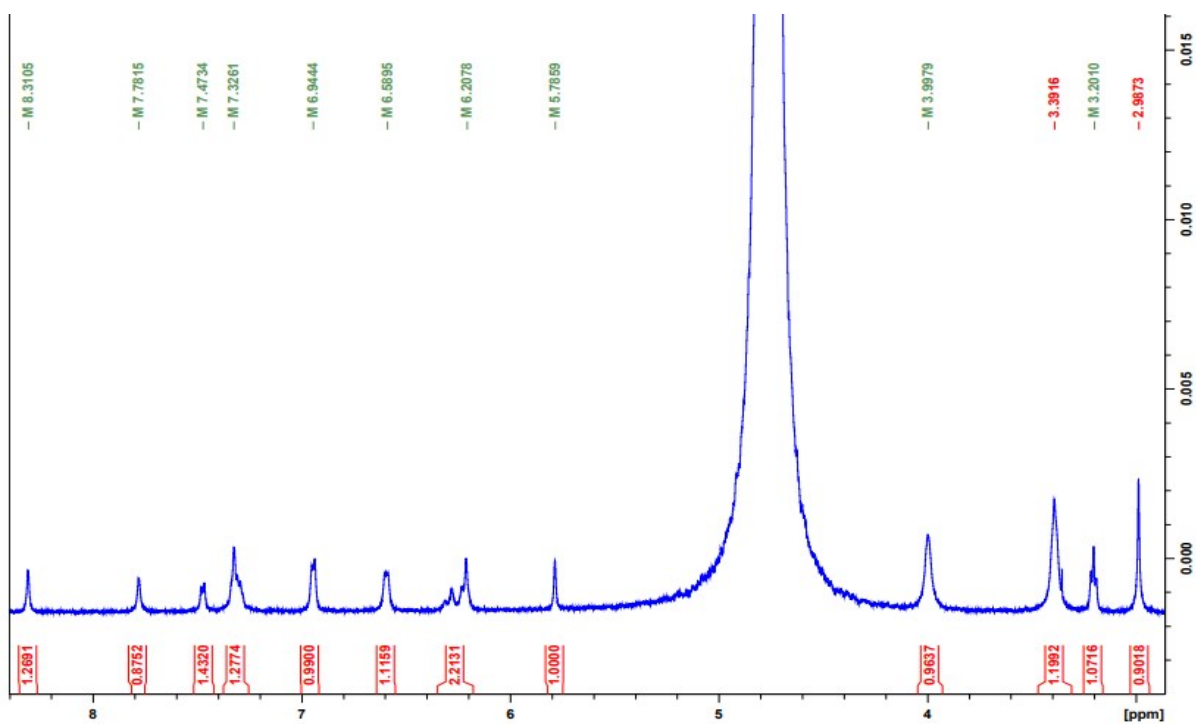

Figure S8. <sup>1</sup>H NMR spectra of 10. Solvent composition 100% sodium acetate buffer.

## <sup>1</sup>H NMR solvent composition experiments of S-MGB **10**.

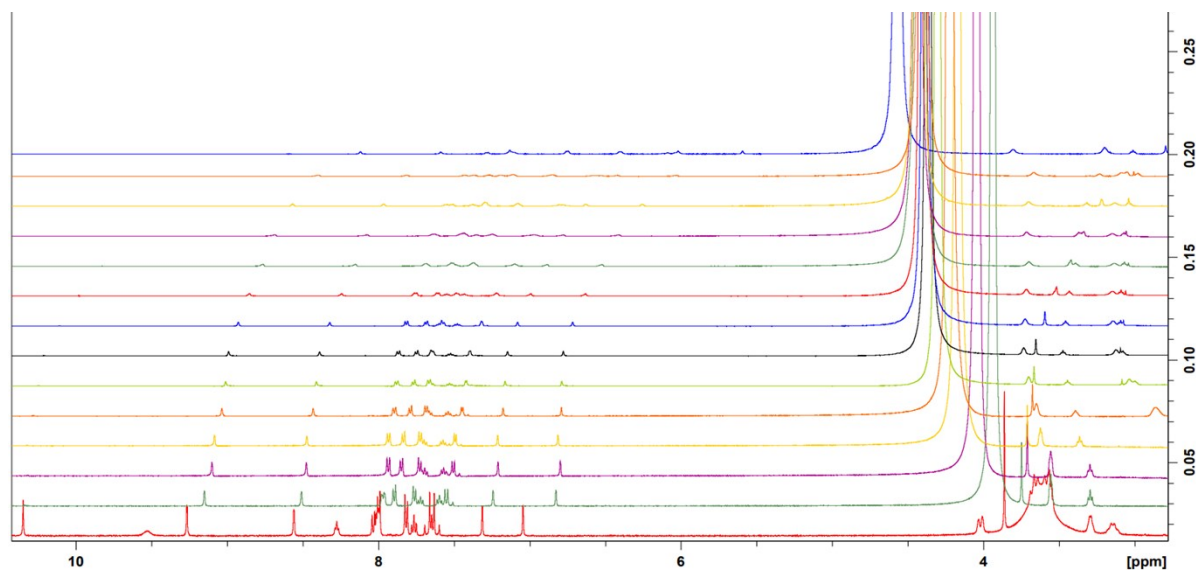

**Figure S9.** Full <sup>1</sup>H NMR spectra of compound **10** composition experiment. The spectra were obtained with the following solvent system compositions: (A) 100 % DMSO-*d*<sub>6</sub> (B) 80 % DMSO-*d*<sub>6</sub>: 20 % 0.1M pH5 sodium acetate buffer, (C) 75 % DMSO-*d*<sub>6</sub>: 25 % 0.1M pH5 sodium acetate buffer, (D) 70 % DMSO-*d*<sub>6</sub>: 30 % 0.1M pH5 sodium acetate buffer, (E) 65 % DMSO-*d*<sub>6</sub>: 35 % 0.1M pH5 sodium acetate buffer, (F) 60 % DMSO-*d*<sub>6</sub>: 40 % 0.1M pH5 sodium acetate buffer, (G) 55 % DMSO-*d*<sub>6</sub>: 45 % 0.1M pH5 sodium acetate buffer, (H) 50 % DMSO-*d*<sub>6</sub>: 50 % 0.1M pH5 sodium acetate buffer, (I) 45 % DMSO-*d*<sub>6</sub>: 55 % 0.1M pH5 sodium acetate buffer, (J) 40 % DMSO-*d*<sub>6</sub>: 60 % 0.1M pH5 sodium acetate buffer, (K) 35 % DMSO-*d*<sub>6</sub>: 65 % 0.1M pH5 sodium acetate buffer, (L) 30 % DMSO-*d*<sub>6</sub>: 70 % 0.1M pH5 sodium acetate buffer, (M) 25 % DMSO-*d*<sub>6</sub>: 75 % 0.1M pH5 sodium acetate buffer, (N) 100 % pH5 sodium acetate buffer. The concentration of S-MGB **10** was fixed at 1.5 mM in each experiment.

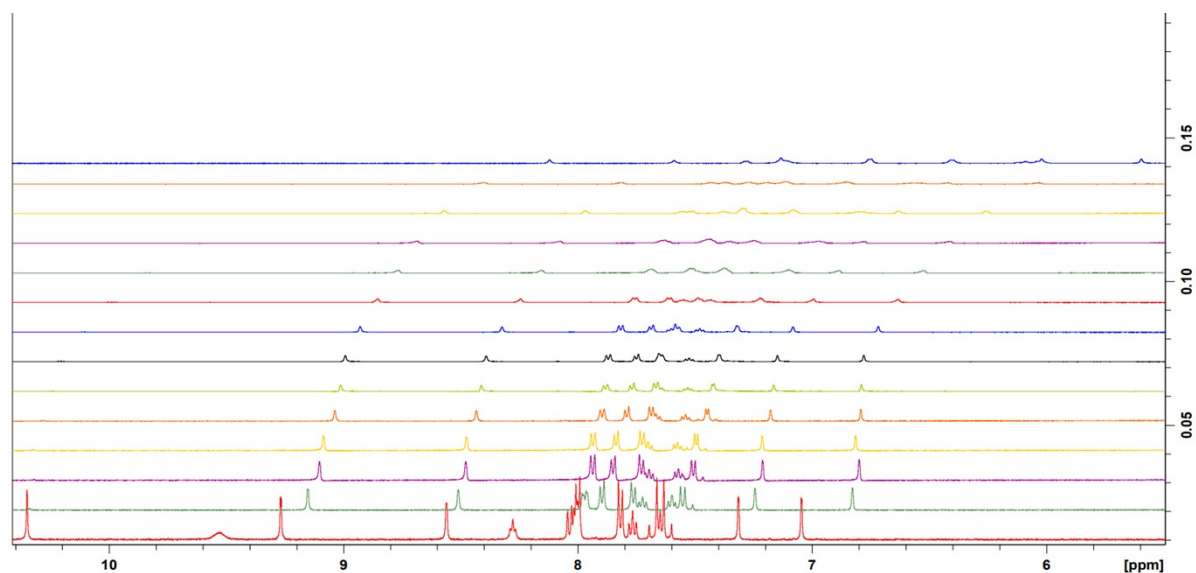

**Figure S10.** <sup>1</sup>H NMR spectra of the aromatic region of compound **10** composition experiment. The spectra were obtained with the following solvent system compositions: (A) 100 % DMSO-*d*<sub>6</sub> (B) 80 % DMSO-*d*<sub>6</sub>: 20 % 0.1M pH5 sodium acetate buffer, (C) 75 % DMSO-*d*<sub>6</sub>: 25 % 0.1M pH5 sodium acetate buffer, (D) 70 % DMSO-*d*<sub>6</sub>: 30 % 0.1M pH5 sodium acetate buffer, (E) 65 % DMSO-*d*<sub>6</sub>: 35 % 0.1M pH5 sodium acetate buffer, (F) 60 % DMSO-*d*<sub>6</sub>: 40 % 0.1M pH5 sodium acetate buffer, (G) 55 % DMSO-*d*<sub>6</sub>: 45 % 0.1M pH5 sodium acetate buffer, (H) 50 % DMSO-*d*<sub>6</sub>: 50 % 0.1M pH5 sodium acetate buffer, (I) 45 % DMSO-*d*<sub>6</sub>: 55 % 0.1M pH5 sodium acetate buffer, (J) 40 % DMSO-*d*<sub>6</sub>: 60 % 0.1M pH5 sodium acetate buffer, (K) 35 % DMSO-*d*<sub>6</sub>: 65 % 0.1M pH5 sodium acetate buffer, (L) 30 % DMSO-*d*<sub>6</sub>: 70 % 0.1M pH5 sodium acetate buffer, (M) 25 % DMSO-*d*<sub>6</sub>: 75 % 0.1M pH5 sodium acetate buffer, (N) 100 % pH5 sodium acetate buffer. The concentration of S-MGB **10** was fixed at 1.5 mM in each experiment.

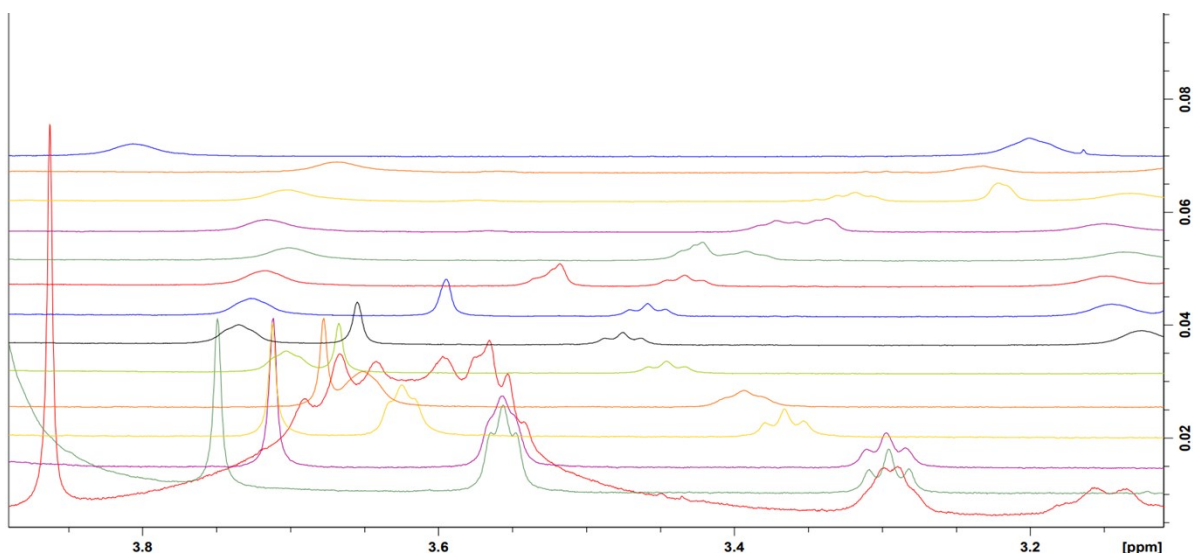

**Figure S11.**  $^1\text{H}$  NMR spectra of aliphatic region of compound **10** composition experiment. The spectra were obtained with the following solvent system compositions: (A) 100 %  $\text{DMSO-}d_6$  (B) 80 %  $\text{DMSO-}d_6$ : 20 % 0.1M pH5 sodium acetate buffer, (C) 75 %  $\text{DMSO-}d_6$ : 25 % 0.1M pH5 sodium acetate buffer, (D) 70 %  $\text{DMSO-}d_6$ : 30 % 0.1M pH5 sodium acetate buffer, (E) 65 %  $\text{DMSO-}d_6$ : 35 % 0.1M pH5 sodium acetate buffer, (F) 60 %  $\text{DMSO-}d_6$ : 40 % 0.1M pH5 sodium acetate buffer, (G) 55 %  $\text{DMSO-}d_6$ : 45 % 0.1M pH5 sodium acetate buffer, (H) 50 %  $\text{DMSO-}d_6$ : 50 % 0.1M pH5 sodium acetate buffer, (I) 45 %  $\text{DMSO-}d_6$ : 55 % 0.1M pH5 sodium acetate buffer, (J) 40 %  $\text{DMSO-}d_6$ : 60 % 0.1M pH5 sodium acetate buffer, (K) 35 %  $\text{DMSO-}d_6$ : 65 % 0.1M pH5 sodium acetate buffer, (L) 30 %  $\text{DMSO-}d_6$ : 70 % 0.1M pH5 sodium acetate buffer, (M) 25 %  $\text{DMSO-}d_6$ : 75 % 0.1M pH5 sodium acetate buffer, (N) 100 % pH5 sodium acetate buffer. The concentration of S-MGB **10** was fixed at 1.5 mM in each experiment.

### $^1\text{H}$ NMR proton peak shift analysis of compound S-MGB **10**

$^1\text{H}$ -NMR spectra were systematically acquired in solvent systems with different proportions of  $\text{DMSO-}d_6$  and 0.1M pH5 sodium acetate buffer, using a fixed concentration of 1.5mM of S-MGB. The graphs below display the data obtained, with each graph focusing on the  $^1\text{H}$ NMR peak shift of a specific proton of compound S-MGB **10**, labelled in **Figure S12**.

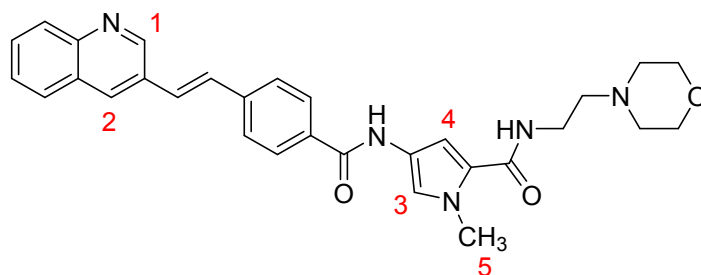

**Figure S12.** Structure and specific proton assignment of S-MGB **10**.

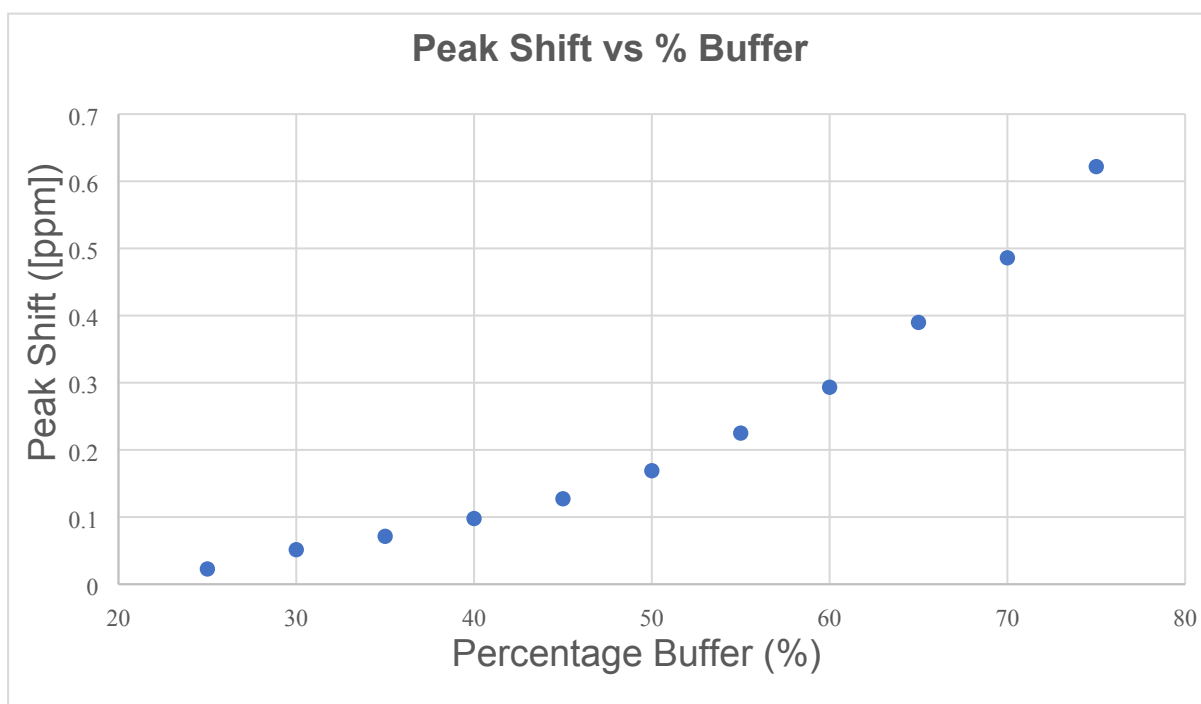

**Graph S9.** Peak shift difference of quinoline proton 1 in varying solvent system compositions.

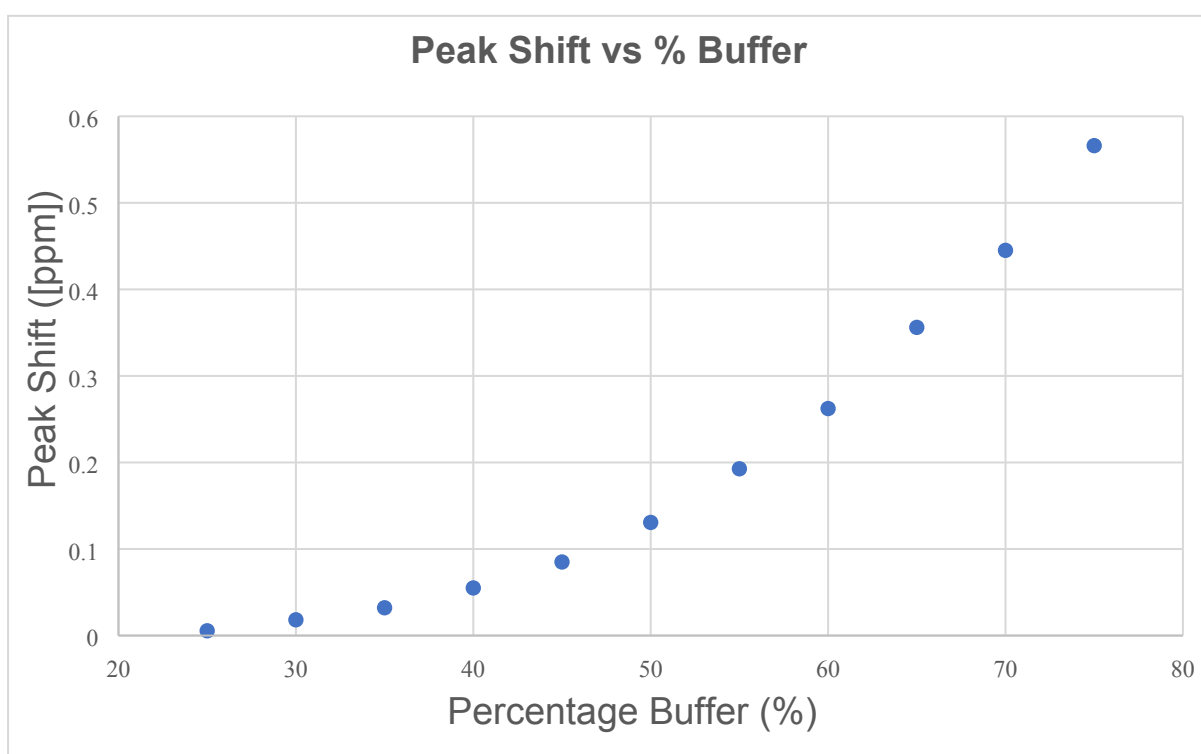

**Graph S10.** Peak shift difference of quinoline proton 2 in varying solvent system compositions.

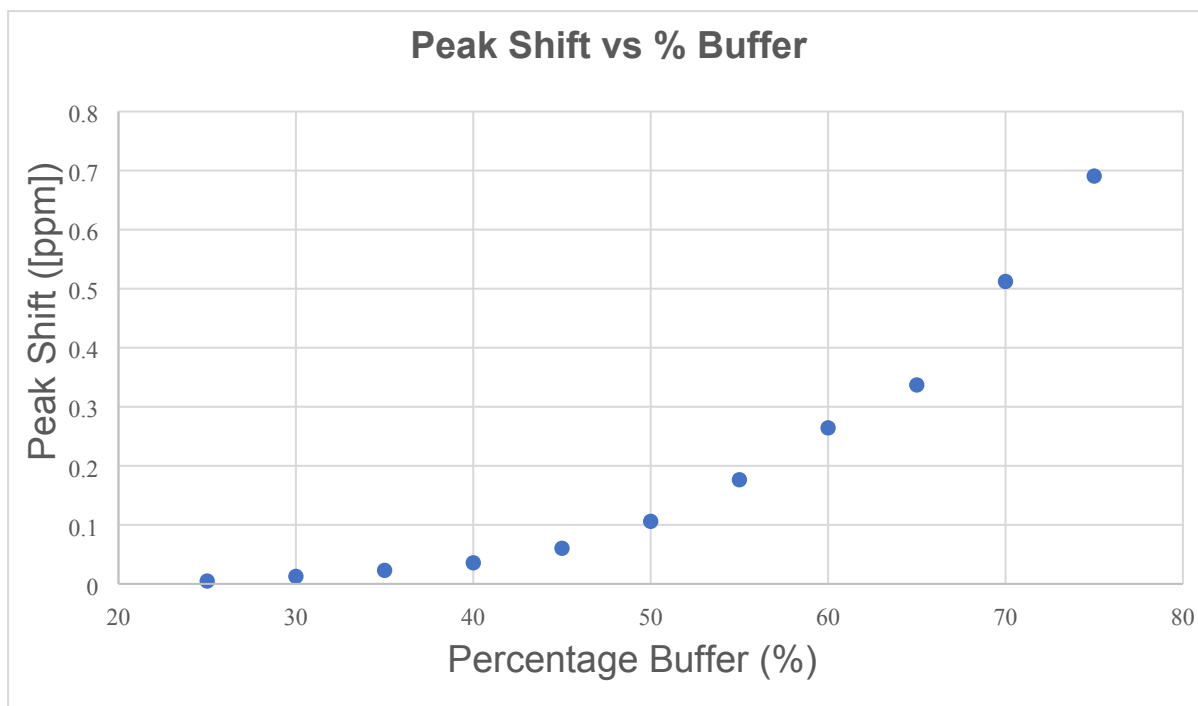

**Graph S11.** Peak shift difference of pyrrole proton **3** in varying solvent system compositions.

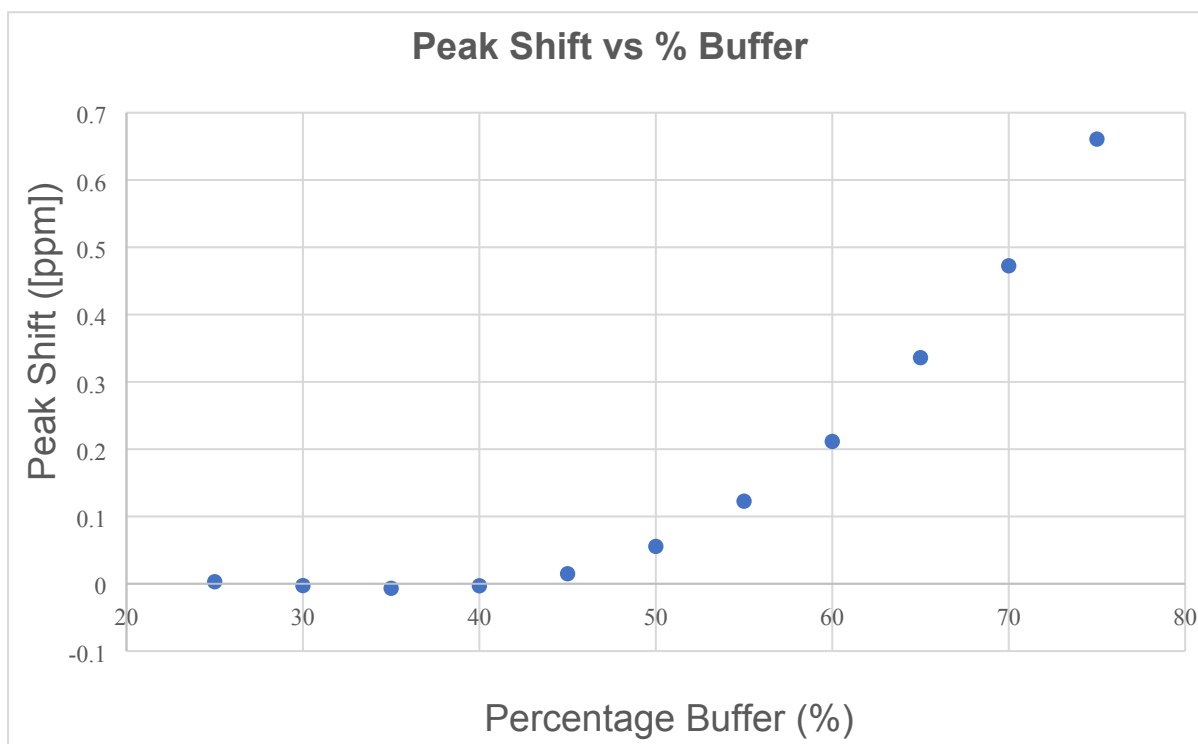

**Graph S12.** Peak shift difference of pyrrole proton **4** in varying solvent system compositions.

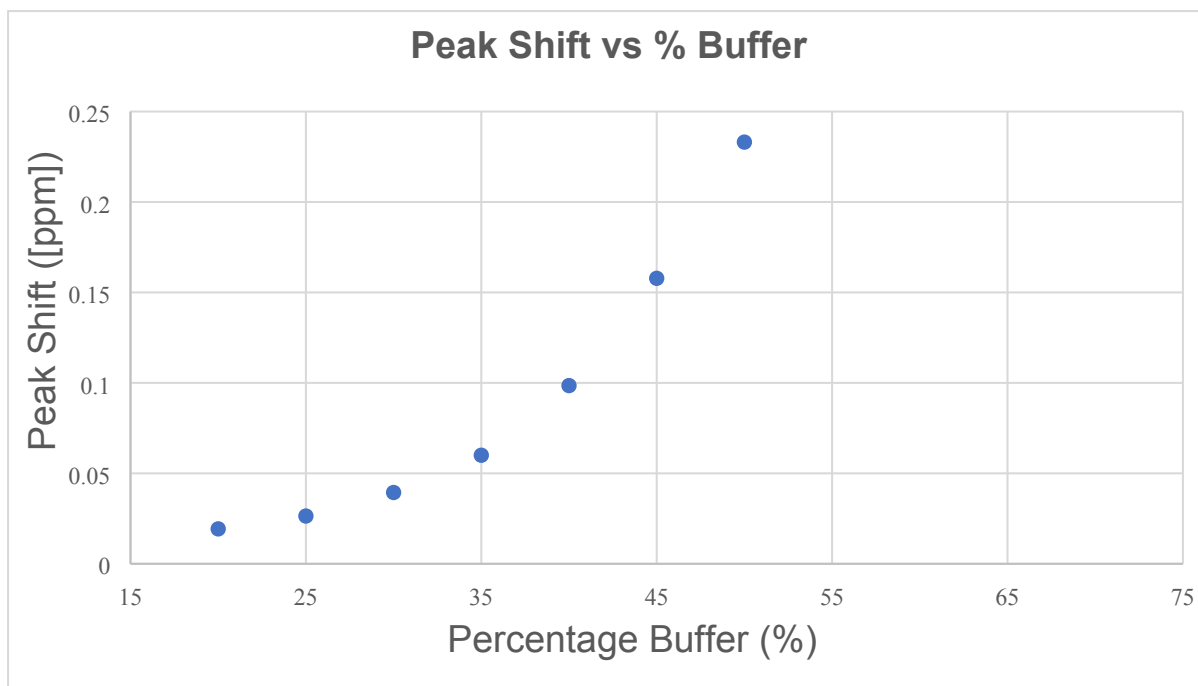

**Graph S13.** Peak shift difference of methyl proton **5** in varying solvent system compositions.

Acquired 2D DOSY and diffusion data for S-MGB **4** and S-MGB **10**

2D DOSY spectra MGB **4**

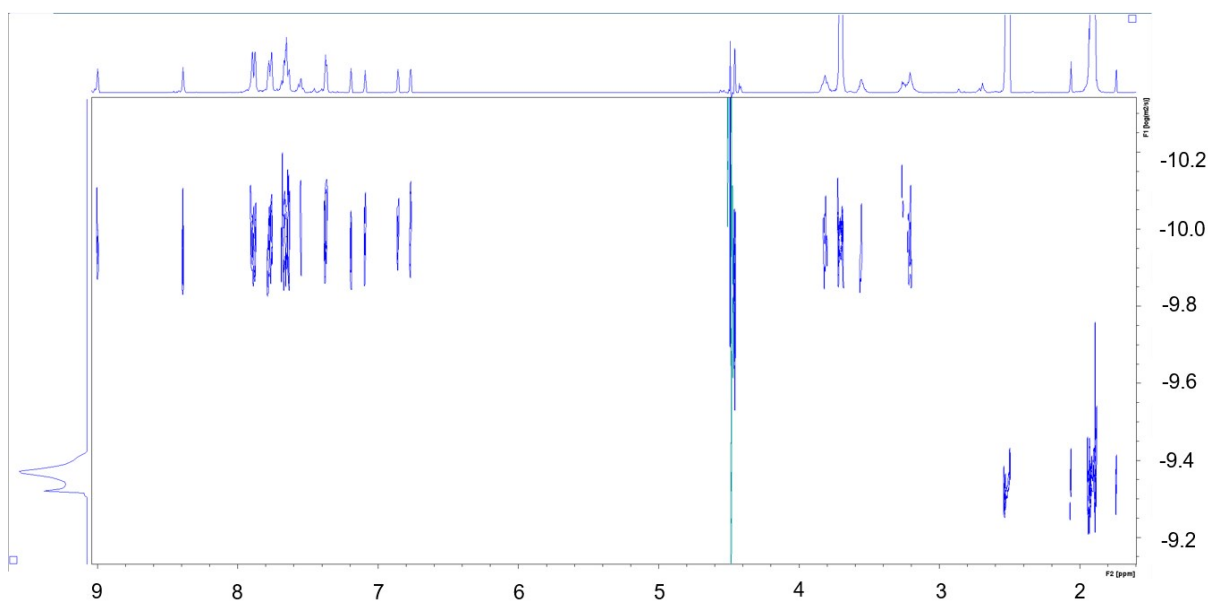

**Figure S13.** 2D DOSY NMR of **4**. Solvent system 50 % DMSO- $d_6$ : 50 % 0.1M pH5 sodium acetate buffer.

Accompanying diffusion data for S-MGB 4

**Table S1.** List of diffusion constants of 4 with the respective peak range.

| <b>Peak Range (ppm)</b> | <b>Diffusion Constant (m<sup>2</sup> s<sup>-1</sup>)</b> |
|-------------------------|----------------------------------------------------------|
| 9.008 – 8.984           | 1.069 x10 <sup>-10</sup>                                 |
| 8.396 – 8.378           | 1.127 x10 <sup>-10</sup>                                 |
| 7.903 – 7.863           | 1.099 x10 <sup>-10</sup>                                 |
| 7.782 – 7.748           | 1.121 x10 <sup>-10</sup>                                 |
| 7.691 – 7.624           | 1.031 x10 <sup>-10</sup>                                 |
| 7.575 – 7.523           | 1.021 x10 <sup>-10</sup>                                 |
| 7.386 – 7.355           | 9.948 x10 <sup>-11</sup>                                 |
| 7.205 – 7.182           | 1.183 x10 <sup>-10</sup>                                 |
| 7.099 – 7.081           | 1.051 x10 <sup>-10</sup>                                 |
| 6.867 – 6.847           | 9.919 x10 <sup>-11</sup>                                 |
| 6.779 – 6.756           | 9.769 x10 <sup>-11</sup>                                 |
| 3.843 – 3.688           | 1.118 x10 <sup>-10</sup>                                 |
| 3.725 – 3.688           | 1.051 x10 <sup>-10</sup>                                 |
| 3.299 – 3.160           | 1.115 x10 <sup>-10</sup>                                 |

**Average** – 1.068 x10<sup>-10</sup> m<sup>2</sup> s<sup>-1</sup>

**Standard Deviation** - 0.061

## Acquired 2D DOSY and diffusion data for S-MGB **10**

### 2D DOSY spectra S-MGB **10**

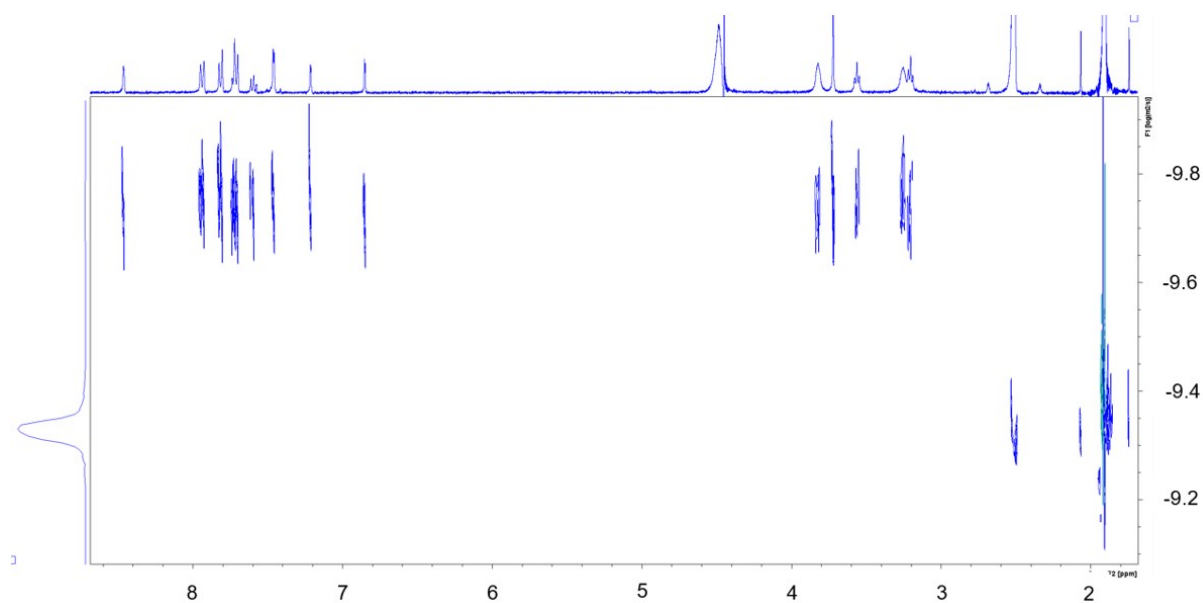

**Figure S 14.** 2D DOSY NMR of **10**. Solvent system 50 % DMSO- $d_6$ : 50 % 0.1M pH5 sodium acetate buffer.

### Accompanying diffusion data for S-MGB **10**

**Table S2.** List of diffusion constants of **10** with the respective peak range.

| Peak Range (ppm) | Diffusion Constant ( $m^2s^{-1}$ ) |
|------------------|------------------------------------|
| 9.077 – 9.048    | $1.721 \times 10^{-10}$            |
| 8.477 – 8.450    | $1.820 \times 10^{-10}$            |
| 7.963 – 7.924    | $1.717 \times 10^{-10}$            |
| 7.836 – 7.800    | $1.711 \times 10^{-10}$            |
| 7.732 – 7.696    | $1.806 \times 10^{-10}$            |
| 7.623 – 7.572    | $1.670 \times 10^{-10}$            |
| 7.477 – 7.451    | $1.748 \times 10^{-10}$            |
| 7.227 – 7.206    | $1.731 \times 10^{-10}$            |
| 6.863 – 6.844    | $1.796 \times 10^{-10}$            |
| 3.846 – 3.801    | $1.815 \times 10^{-10}$            |
| 3.732 – 3.709    | $1.757 \times 10^{-10}$            |
| 3.583 – 3.540    | $1.757 \times 10^{-10}$            |



|               |                         |
|---------------|-------------------------|
| 3.276 – 3.237 | $1.696 \times 10^{-10}$ |
| 3.224 – 3.185 | $1.800 \times 10^{-10}$ |

**Average** –  $1.753 \times 10^{-10} \text{ m}^2 \text{ s}^{-1}$

**Standard Deviation** – 0.048

2D DOSY spectra of S-MGB **4** and S-MGB **10** overlay

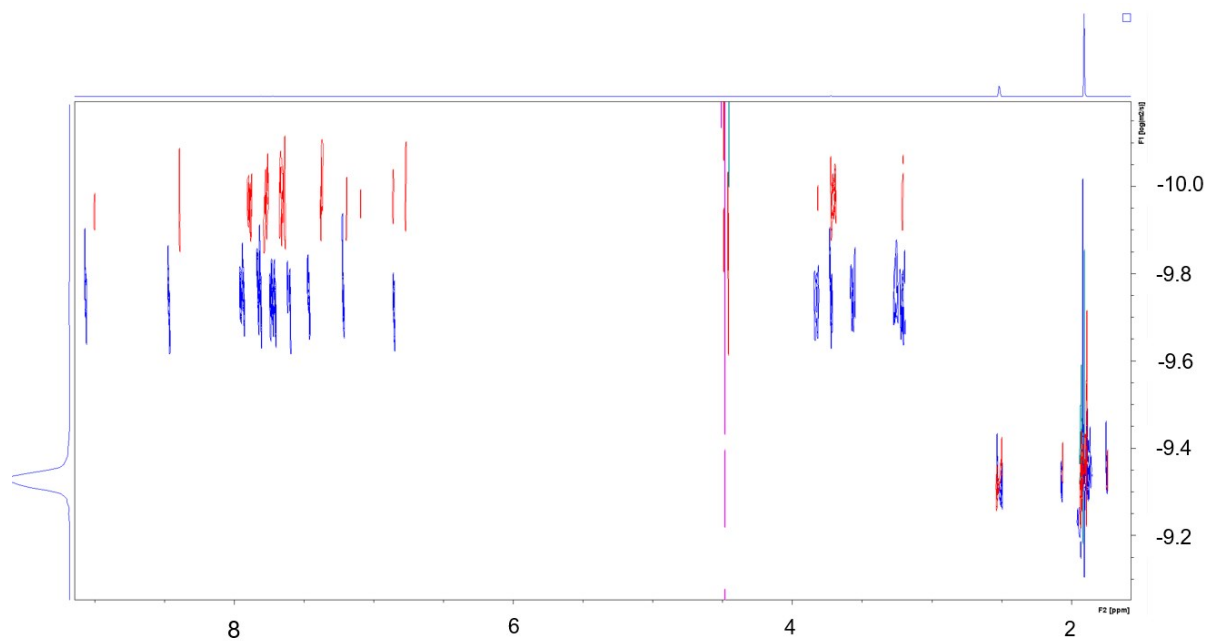

**Figure S15.** 2D DOSY NMR of both **4** (blue) and **10** (red) overlaid. Solvent system 50 % DMSO- $d_6$ ; 50 % 0.1M pH5 sodium acetate buffer.
